## Transgenic $\alpha_{1A}$ -adrenergic activation limits post-infarct ventricular remodeling and dysfunction and improves survival

Xiao-Jun Du <sup>a,\*</sup>, Xiao-Ming Gao <sup>a</sup>, Helen Kiriazis <sup>a</sup>, Xiao-Lei Moore <sup>a</sup>, Ziqiu Ming <sup>a</sup>, Yidan Su <sup>a</sup>, Angela M. Finch <sup>c</sup>, Ross A. Hannan <sup>b</sup>, Anthony M. Dart <sup>a</sup>, Robert M. Graham <sup>c</sup>

<sup>a</sup> Experimental Cardiology Laboratory, Baker Heart Research Institute, and Alfred Heart Centre, Alfred Hospital, Melbourne, Australia

<sup>b</sup> Growth Control Laboratory, Peter MacCallum Cancer Centre and Biochemistry and Molecular Biology Department, University of Melbourne, Melbourne, Australia

<sup>c</sup> Victor Chang Cardiac Research Institute and St. Vincent Hospital, Sydney, Australia

Received 21 April 2006; received in revised form 15 May 2006; accepted 8 June 2006

Available online 16 June 2006

Time for primary review 16 days

### Abstract

**Objective:** Myocardial contractility is enhanced in transgenic (TG) mice with cardiac-restricted overexpression of the  $\alpha_{1A}$ -adrenergic receptors ( $\alpha_{1A}$ -AR). We tested the hypothesis that this enhanced inotropy protects against dysfunction and remodeling after myocardial infarction (MI).

**Methods:** We subjected  $\alpha_{1A}$ -TG and non-TG mice (NTG) to MI and determined changes in left ventricular (LV) function and diastolic dimension (LVDD) by echocardiography prior to and at 1, 3, 7, 12 and 15 weeks thereafter.

**Results:** Although infarct size was similar in the NTG and  $\alpha_{1A}$ -TG groups ( $32 \pm 2$  vs.  $29 \pm 2\%$  of LV,  $P = \text{NS}$ ), mortality due to heart failure was lower after MI in the  $\alpha_{1A}$ -TG (37%,  $n = 39$ ) than that in the NTG animals (63%,  $n = 56$ ,  $P = 0.026$ ). NTG and  $\alpha_{1A}$ -TG mice showed similar reductions in LV fractional shortening (FS) and increases in LVDD at week-1 after MI. However, whereas NTG mice showed continuous deterioration over a 15-week period after MI in FS (fell by 40%, from  $30 \pm 2$  to  $18 \pm 1\%$ ,  $P < 0.01$ ) and LVDD (increased by 24%, from  $4.2 \pm 0.1$  to  $5.2 \pm 0.1$  mm,  $P < 0.01$ ), the changes in both FS (fell by 14%, from  $42 \pm 2$  to  $36 \pm 2\%$ ) and LVDD (increased by 8%, from  $3.8 \pm 0.1$  to  $4.1 \pm 0.1$  mm, both changes  $P < 0.01$  vs. NTG) were significantly less severe in the  $\alpha_{1A}$ -TG mice and did not progress after 3 weeks. At 15 weeks after MI, LV catheterization revealed better preservation of  $dP/dt_{\text{max}}$  in the  $\alpha_{1A}$ -TG vs. NTG mice ( $7270 \pm 324$ , vs.  $5938 \pm 372$  mmHg/s,  $P < 0.05$ ).

**Conclusion:** Enhanced inotropy resulting from transgenic overexpression of  $\alpha_{1A}$ -AR is well maintained chronically after MI and limits echocardiography-determined LV remodeling, preserves function, and reduces acute heart failure death.

© 2006 European Society of Cardiology. Published by Elsevier B.V. All rights reserved.

**Keywords:**  $\alpha_{1A}$ -adrenergic receptor; Heart failure; Ventricular remodeling

### 1. Introduction

The myocardial  $\alpha_{1A}$ -adrenergic receptor (AR) has long been regarded as one of key mediators of myocardial hypertrophy [1,2], but, in the normal heart are thought to contribute little to contractile function relative to  $\beta$ -ARs [3]. We showed previously that overexpression of the  $\alpha_{1A}$ -AR ( $\alpha_{1A}$ -TG) in mouse hearts by up to 170-fold leads to

enhanced inotropy but not lusitropy [3]. Unlike studies using cultured rat cardiac myocytes, activation of  $\alpha_{1A}$ -ARs in this model does not lead to cardiac hypertrophy, even at advanced ages [4]. Given that  $\beta$ -AR signaling is down-regulated in the hypertrophied and failing heart, whereas  $\alpha_{1A}$ -AR signaling is largely preserved [5], this model provides a useful tool for evaluating the contribution of  $\alpha_{1A}$ -ARs to cardiac function under pathological conditions.

Recently we have shown that activated  $\alpha_{1A}$ -AR signaling protects against LV dysfunction in  $\alpha_{1A}$ -TG mice despite comparable degrees of pressure-overload hypertrophy to that

\* Corresponding author. Tel.: +61 3 85321267; fax: +61 3 85321100.

E-mail address: xiaojun.du@baker.edu.au (X.-J. Du).

in NTG controls [6]. However, it is possible that this beneficial effect of  $\alpha_{1A}$ -AR activation is etiology-dependent. Indeed, we have also demonstrated that enhanced myocardial contractility due to cardiac overexpression of  $\beta_2$ -AR has opposing effects when evaluated in animals with pressure-overload as compared to myocardial infarction (MI) [7,8].

Infarction of a substantial mass of working myocardium results in ventricular dysfunction and remodeling [9,10]. This involves infarct-segment expansion, hypertrophy and fibrosis of non-infarcted myocardium, and dilatation of the LV cavity, a remodeling process that contributes to the development and worsening of heart failure (HF) [9,11]. Recent animal studies using genetically engineered mice, or mice subjected to adenoviral gene transfer, have shown that interventions that enhance myocardial contractility not only preserve function but also limit the degree of remodeling after MI [12,13]. Enhanced contractility also prevents remodeling in a genetic model of dilated cardiomyopathy [14].

Here we examined if activation of myocardial  $\alpha_{1A}$ -ARs is beneficial after MI. Serial echocardiography was performed in  $\alpha_{1A}$ -TG and NTG mice over a 15-week period after MI to evaluate the extent of LV remodeling and dysfunction. To address the long-term impact of  $\alpha_{1A}$ -AR overexpression, we also examined survival and cardiac function in  $\alpha_{1A}$ -TG mice at 12-months of age.

## 2. Methods

### 2.1. Animals and surgery

The A1A2  $\alpha_{1A}$ -TG line with 66-fold overexpression of the rat  $\alpha_{1A}$ -AR and their NTG littermates were studied [3]. The functional phenotype of this  $\alpha_{1A}$ -TG line has been previously described in detail [3,6]. Mice were 3–4 months of age and on a FVB/N genetic background. Both male and female mice were used and each group was matched for gender ratio. Animals were housed under standard conditions and were inspected at least twice daily during the study period. Experimental procedures were approved by our institutional Animal Ethics Committee in accordance with the NIH guidelines.

Animals (73 NTG and 56  $\alpha_{1A}$ -TG) were randomly assigned to either MI or sham-operation. MI was induced by open-chest surgery to occlude the left coronary artery, as we previously described in detail [7,15]. All mice that died during the study period were subjected to post-mortem examination to determine if the cause of death was HF. Our criteria for HF were signs of chest fluid accumulation, lung congestion and, in chronic HF, the presence of organized thrombus in the left atrium, as described previously [7,16].

Another cohort of  $\alpha_{1A}$ -TG and NTG mice ( $n=25$  per genotype with gender matching) were monitored for survival from ages 4 to 12 months, at which time cardiac function was evaluated by echocardiography and catheterization.

### 2.2. Echocardiography and hemodynamic determination

Echocardiography was performed before surgery (week-0) and at 1, 3, 7, 12 and 15 weeks after MI, using a Hewlett–Packard Sonos 5500 ultrasound machine and a 15 MHz linear transducer. Animals were lightly anesthetized (ketamine, xylazine and atropine at 50, 10 and 0.6 mg/kg, i.p., respectively) for these evaluations. 2-D guided M-mode tracings were derived from the short-axis loop of the LV. The following parameters were determined from the M-mode tracings: heart rate (HR), LV dimensions at end-systole and end-diastole (LVDs, LVDd, respectively), external LV dimension at end-diastole (ExLVDD), and posterior (non-infarcted) wall thickness at end-diastole and end-systole. Fractional shortening [ $FS\%=(LVDd-LVDs)/LVDd$ ], and contractile increments in wall thickness were calculated. To ensure that differences observed between the genotypes were independent of the anesthetic used, we also performed echocardiography at 14 weeks after surgery, on mice anesthetized with avertin (at 250 mg/kg, i.p.). To analyze echocardiographic images, a coding system was used to ensure that the data remained blinded.

At the end of the 15-week study period, animals were anesthetized (ketamine, xylazine and atropine at 100, 20 and 1.2 mg/kg, i.p., respectively) and a 1.4 F Millar catheter inserted via the right carotid artery into the LV. Aortic blood pressure, LV pressure and the maximal rates of rise and fall of LV pressure ( $dP/dt_{max}$  and  $dP/dt_{min}$ , respectively) were determined, as described previously [6,7,15].

### 2.3. Organ weights and infarct size

After removal of atria and the right ventricle, with the aid of a surgical microscope, the LV was cut open and pinned down to flatten the entire LV wall, with the endocardial surface exposed. The LV was photographed using a digital camera. A chronic infarct in mouse hearts was easy to be identified by its pale color and clear demarcation from non-infarcted myocardium (Fig. 1A). The infarcted area and the entire LV surface area were measured digitally using Optima's image analysis system. Infarct size was calculated and expressed as a percentage of the entire LV surface area [17]. Non-infarcted LVs were then separated microscopically and frozen for biochemical assays.

### 2.4. Quantitative real-time PCR and hydroxyproline assays

Total RNA was extracted from non-infarcted LV with TRIzol. After DNAase treatment, 1  $\mu$ g RNA was reverse transcribed using random primers and Superscript III RNase transcriptase. Using real-time PCR SYBR Green Master Mix with the ABI PRISM 7700 sequence detection system, we then determined, in duplicate, the mRNA levels of atrial natriuretic peptide (ANP),  $\alpha$ -skeletal actin ( $\alpha$ -SkA),  $\beta$ - or  $\alpha$ -myosin heavy chain ( $\beta$ -MHC,  $\alpha$ -MHC), sarcoendoplasmic

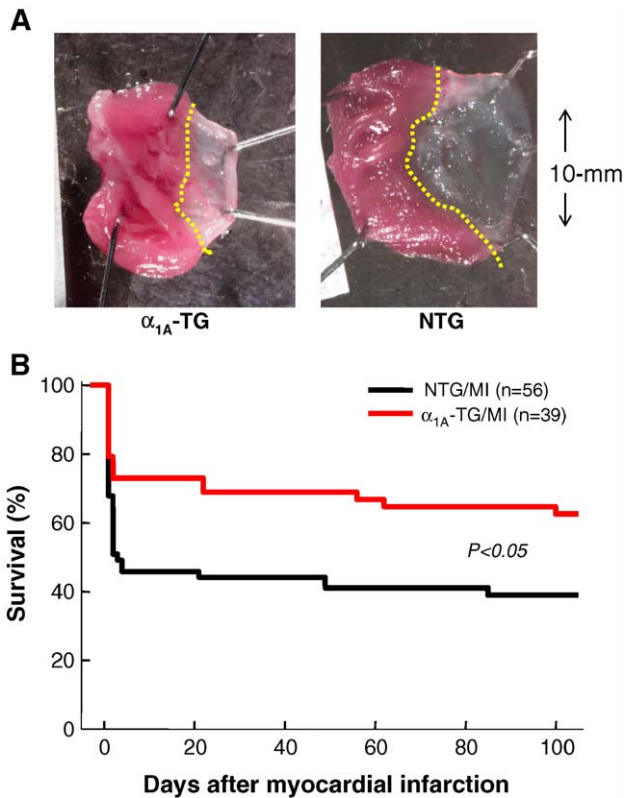

Fig. 1. A, Photos showing infarcted mouse left ventricle (LV, the right ventricle and atria were trimmed off). The LV was cut open and pinned in such a way that the entire LV wall was flat. From digital images, the endocardial surface areas of the infarcted (pale) and non-infarcted (pink) zones were determined using image analysis software. Infarct size was expressed as % entire LV surface area. Dilatation of the infarcted NTG LV was evident by an increase in LV size. B, Survival of the NTG and  $\alpha_{1A}$ -TG mice over 15 weeks post-MI by Kaplan–Meier method. Only mice that fully recovered from surgery were included in this survival analysis. There was no loss of sham-operated mice during the study period (curve not shown).

reticulum  $\text{Ca}^{2+}$ -ATPase 2a (SERCA2a), procollagen (types 1 and 3), matrix metalloproteinases (MMP types 2, 9 and 13), connective tissue growth factor (CTGF) and fibronectin. Expression of a reference gene, 18S, was used to normalize the mRNA levels. For each sample, a single amplified product was confirmed by dissociation curve analysis.

The content of collagen in the LV myocardium was determined by measuring the concentration of hydroxyproline, as previously described [18].

### 2.5. Statistics

Results are presented as means  $\pm$  SEM. Statistical analyses were performed using Sigma Stat 2.03 software with one- or two-way ANOVA for repeated measures, followed by the Neuman–Kuel test. Fisher exact test was used for comparison of events between groups. The least-square method was used for correlation analyses. Survival was analyzed using the Kaplan–Meier method. Statistical significance was accepted at a value of  $P < 0.05$ .

## 3. Results

### 3.1. Post-infarct survival

Surgery-related deaths were comparable in the  $\alpha_{1A}$ -TG and NTG mice (about 10%). Four mice (2 in each group) were excluded, as their infarct size was less than 15%, as determined at the end of the study. All mice that fully recovered from anesthesia for at least 8 h were counted in the survival analysis. NTG mice with MI had a higher mortality that occurred during the first few days after surgery. Typical autopsy findings in these mice included severe pulmonary edema, pleural effusions and the presence of a recent infarct, indicating acute left heart failure, rather than fatal arrhythmias, as the likely cause of death. There was no gender-bias in the prevalence of such acute deaths. Rupture of the LV free wall, another cause of death in mice within the first week after MI [17], was rare (1 NTG and 2  $\alpha_{1A}$ -TG). In  $\alpha_{1A}$ -TG mice, acute HF deaths were significantly lower than that in NTG (28.2% vs. 53.7%,  $P < 0.05$ , Fig. 1B). Lung wet weights were determined at autopsy as a measure of pulmonary edema in about half of the mice that died acutely, and found to be significantly greater in the  $\alpha_{1A}$ -TG mice than in their NTG littermates ( $415 \pm 15$  mg,  $n = 10$  vs.  $337 \pm 14$  mg,  $n = 16$ ,  $P < 0.01$ ), which suggest that the  $\alpha_{1A}$ -TGs had tolerated a more severe degree of HF before death than the NTGs. Deaths during the chronic phase of MI were all due to HF and there was no difference in their incidence in the two groups (Fig. 1B). Thus, overall post-infarct survival was better in  $\alpha_{1A}$ -TG than NTG mice ( $P = 0.026$ ), and this was entirely due to a lower incidence of acute death in  $\alpha_{1A}$ -TG group.

### 3.2. Serial echocardiography

Consistent with the  $\alpha_{1A}$ -TG mice displaying enhanced inotropy [3,6], echocardiography prior to surgery revealed markedly higher FS (Fig. 2C) in the  $\alpha_{1A}$ -TG than in the NTG animals, which was associated with a smaller LVDs, as observed previously [3,6]. Such differences were maintained throughout the study in both sham-operated groups (Fig. 2B,C).

To monitor time-dependent changes in LV remodeling and dysfunction, serial echocardiography was performed during the 15-weeks after MI. HR determined by echocardiography with the animals lightly anesthetized, was similar in the  $\alpha_{1A}$ -TG and NTG animals at all time-points studied (Table 1). Compared with the week-0 value or with the respective sham-operated group, MI led to significant increases in both LVdD and LVDs by week-1 (Table 1, Fig. 2B). The absolute degree of this acute remodeling was comparable in the two groups. From 1 to 15 weeks post-MI, the NTG mice showed a progressive increase in diastolic LV cavity, measured as LVdD (Fig. 2B, D). In comparison, the net increase in the LVdD of  $\alpha_{1A}$ -TG mice during this period was less marked (Fig. 2D). Changes in the LVDs during 1 to 15 weeks showed a similar pattern, with more marked

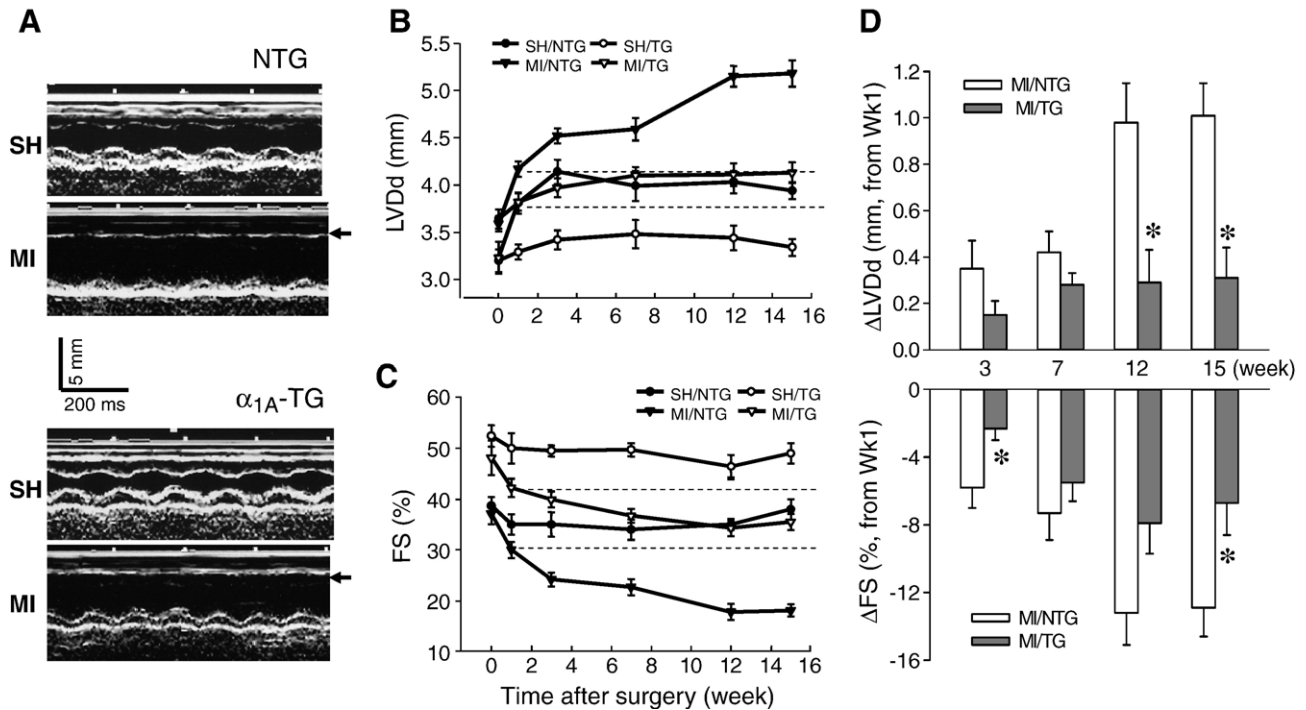

Fig. 2. A, Representative M-mode echocardiographic images obtained at week-15 from sham-operated (SH) and infarcted (MI) NTG and  $\alpha_{1A}$ -TG mice. Note that the infarcted walls displayed akinesis (arrowheads). B and C, Time-dependent changes in the LV end-diastolic dimension (LVDD) and fractional shortening (FS) in the sham-operated ( $n=9-10$ /group) and infarcted ( $n=19-20$ /group) NTG (SH/NTG and MI/NTG, respectively, filled symbols) and  $\alpha_{1A}$ -TG (SH/TG and MI/TG, respectively, open symbols) animals. Other echocardiographic parameters are given in Table 1. The dotted reference lines represent the week-1 levels for the infarcted groups. Both parameters differed significantly between NTG and  $\alpha_{1A}$ -TG groups at all time-points studied over the 15 weeks post-infarction. The differences between SH/NTG vs. MI/NTG, SH/TG vs. MI/TG, SH/NTG vs. SH/TG or MI/NTG vs. MI/TG were highly significant ( $P<0.01$  by two-way ANOVA). D, Temporal changes in LVDD and FS from week-1 to week-15 in both infarcted groups. Results were expressed as the net change from the week-1 values. \* $P<0.05$  vs. MI/NTG by 2-way ANOVA for repeated measures.

increases being observed in NTG (+1.31 mm) than in the  $\alpha_{1A}$ -TG group (+0.44 mm,  $P<0.01$ , Table 1).

LV contractile function was assessed by FS and systolic thickening of the non-infarcted posterior wall. Following a similar decline in FS at week-1 after MI in both groups, the  $\alpha_{1A}$ -TG mice showed a less pronounced fall thereafter and FS was maintained at equivalent level of the NTG sham-operated controls (Fig. 2C, D). Throughout the study period, contractile thickening of the posterior wall in  $\alpha_{1A}$ -TG mice with MI remained greater than that in NTG group (Table 1), further evidence for preservation of enhanced inotropy in  $\alpha_{1A}$ -TGs. Similar measures were undertaken at week-14 post-MI in all animals anesthetized with avertin. This revealed between-group differences in the NTG and  $\alpha_{1A}$ -TG mice, that were comparable to those observed with ketamine/xylazine/atropine anesthesia in LVDD ( $3.96\pm 0.11$  vs.  $4.59\pm 0.22$  mm), LVDs ( $2.37\pm 0.12$  vs.  $3.50\pm 0.34$  mm) and FS ( $41\pm 2$  vs.  $27\pm 4\%$ , all  $P<0.05$ ). In both groups with MI, HR was also comparable under avertin-anesthesia ( $\alpha_{1A}$ -TG,  $471\pm 12$  vs. NTG,  $485\pm 23$  beats/min).

### 3.3. Hemodynamics

Micromanometry data was available for all sham-operated mice and for 11 NTG and 12  $\alpha_{1A}$ -TG animals

with MI. At week-15 post-MI, there was no significant difference between the  $\alpha_{1A}$ -TG and NTG groups in heart rate, blood pressure, LV pressure or  $dP/dt$ . NTG mice with MI had significant reductions in LV  $dP/dt_{max}$  and LV  $dP/dt_{min}$  (Table 2). A similar trend was observed in infarcted  $\alpha_{1A}$ -TG vs. sham-operated  $\alpha_{1A}$ -TGs. However,  $dP/dt_{max}$ , but not  $dP/dt_{min}$ , was higher in the infarcted  $\alpha_{1A}$ -TG than NTG mice, and as a result, the ratio of  $dP/dt_{max}:dP/dt_{min}$  was also higher in the  $\alpha_{1A}$ -TG animals (Table 2).

### 3.4. Organ weights and infarct size

All sham-operated mice ( $n=9$ /group) and 20 NTG and 19  $\alpha_{1A}$ -TG mice with MI survived to the end of the study. Body weight was not significantly different among the groups (Table 3). In mice with MI, infarct size ranged from 15% to 46% and was not significantly different in the NTG and  $\alpha_{1A}$ -TG groups (Table 3). Also both groups had similar increase in the LV weight and heart weight compared to their respective sham-operated controls, and a similar incidence of chest fluid accumulation or chronic atrial thrombus-formation.

In both groups, infarct size correlated negatively with FS ( $r=-0.774$  in  $\alpha_{1A}$ -TG;  $r=-0.812$  in NTG, both  $P<0.01$ ) and positively with LVDD ( $r=0.816$  in  $\alpha_{1A}$ -TG,  $r=0.778$  in

Table 1

Echocardiographic parameters obtained prior to (week-0) and at different time-points after sham-operation (SH) or myocardial infarction (MI) in  $\alpha_{1A}$ -AR transgenic ( $\alpha_{1A}$ -TG) and non-transgenic (NTG) mice

| Parameters                          | Week-0     | Week-1     | Week-3     | Week-7     | Week-12    | Week-15    |
|-------------------------------------|------------|------------|------------|------------|------------|------------|
| <i>Heart rate, beats/min</i>        |            |            |            |            |            |            |
| NTG/SH                              | 379±18     | 365±14     | 351±11     | 409±18     | 359±14     | 386±10     |
| $\alpha_{1A}$ -TG/SH                | 387±13     | 402±10     | 405±11     | 387±17     | 385±10     | 398±13     |
| NTG/MI                              | 370±17     | 328±18     | 355±7      | 367±10     | 397±13     | 417±13     |
| $\alpha_{1A}$ -TG/MI                | 402±9      | 364±17     | 372±11     | 359±9      | 379±8      | 376±7      |
| <i>Ext LVDD, mm</i>                 |            |            |            |            |            |            |
| NTG/SH                              | 5.04±0.08  | 5.20±0.08  | 5.31±0.09  | 5.26±0.14  | 5.45±0.14  | 5.31±0.08  |
| $\alpha_{1A}$ -TG/SH                | 4.62±0.07* | 4.58±0.11  | 4.73±0.08  | 4.82±0.09* | 4.86±0.12* | 4.92±0.10  |
| NTG/MI                              | 5.07±0.06  | 5.53±0.09  | 5.85±0.10  | 5.89±0.12  | 6.48±0.10  | 6.58±0.12  |
| $\alpha_{1A}$ -TG/MI                | 4.78±0.13  | 5.35±0.08  | 5.57±0.11  | 5.65±0.10* | 5.67±0.11* | 5.67±0.11* |
| <i>LVDs, mm</i>                     |            |            |            |            |            |            |
| NTG/SH                              | 2.24±0.09  | 2.48±0.11  | 2.71±0.15  | 2.65±0.17  | 2.64±0.13  | 2.47±0.10  |
| $\alpha_{1A}$ -TG/SH                | 1.54±0.10* | 1.64±0.13* | 1.73±0.07* | 1.75±0.08* | 1.86±0.13* | 1.72±0.08* |
| NTG/MI                              | 2.33±0.08  | 2.95±0.11  | 3.43±0.10  | 3.57±0.14  | 4.26±0.16  | 4.26±0.14  |
| $\alpha_{1A}$ -TG/MI                | 1.70±0.18* | 2.24±0.11* | 2.40±0.10* | 2.61±0.10* | 2.72±0.13* | 2.68±0.13* |
| <i>Systolic wall thickening, mm</i> |            |            |            |            |            |            |
| NTG/SH                              | 0.36±0.03  | 0.37±0.03  | 0.38±0.02  | 0.38±0.03  | 0.40±0.03  | 0.35±0.03  |
| $\alpha_{1A}$ -TG/SH                | 0.60±0.03* | 0.48±0.08  | 0.56±0.06* | 0.63±0.08* | 0.51±0.06* | 0.54±0.01* |
| NTG/MI                              | 0.48±0.03  | 0.36±0.03  | 0.32±0.03  | 0.34±0.03  | 0.29±0.03  | 0.26±0.04  |
| $\alpha_{1A}$ -TG/MI                | 0.61±0.03* | 0.52±0.03* | 0.50±0.03* | 0.51±0.03* | 0.48±0.02* | 0.47±0.03* |

Ext LVDD, external LV diameter at end-diastole; LVDs, LV diameter at end-systole. \* $P<0.05$  vs. respective NTG group by two-way ANOVA for repeated measures.

NTG, both  $P<0.01$ , Fig. 3). FS and LVDD were better preserved in the  $\alpha_{1A}$ -TGs, irrespective of infarct size.

### 3.5. Gene expression and collagen content in the non-infarcted LV myocardium

In response to chronic MI (15-weeks), the non-infarcted LV myocardium of the NTG mice displayed significant increase in the expression of ANP (~6-fold) and  $\beta$ -MHC (~4-fold), and a lesser increase in  $\alpha$ -SkA expression as compared to the LV myocardium of the sham-operated NTG controls (Fig. 4). Expression of ANP and  $\alpha$ -SkA was

elevated in the sham-operated  $\alpha_{1A}$ -TG hearts compared to their NTG counterparts, with no further increase in these genes in the  $\alpha_{1A}$ -TG hearts post-MI.  $\alpha$ -MHC and SERCA2a expression were not different in the hearts of the NTG and  $\alpha_{1A}$ -TG mice (Fig. 4).

Collagen content in the LV was comparable between  $\alpha_{1A}$ -TG and NTG sham-operated groups. In the NTG animals, MI was associated with a 40% rise in collagen level in the non-infarcted LV. This increase was, however, more marked in the  $\alpha_{1A}$ -TG hearts (~3-fold,  $P<0.05$  vs. NTG, Fig. 4). Compared with sham-operated controls, Procollagen-1 and 3 transcripts in NTG hearts were significantly increased in the

Table 2

Hemodynamic determination by catheterization from mice that survived to week-15 after surgery

| Parameters                                 | NTG/SH    | $\alpha_{1A}$ -TG/SH | NTG/MI                | $\alpha_{1A}$ -TG/MI |
|--------------------------------------------|-----------|----------------------|-----------------------|----------------------|
| Group size                                 | 9         | 9                    | 11                    | 12                   |
| HR, beats/min                              | 274±18    | 325±11               | 316±9                 | 310±14               |
| SAP, mmHg                                  | 105±6     | 90±5 <sup>†</sup>    | 97±3                  | 99±3                 |
| DAP, mmHg                                  | 64±4      | 57±4                 | 64±2                  | 67±3                 |
| LVEDP, mmHg                                | 10±1      | 5.4±0.7              | 7±1                   | 5±1                  |
| LVSP, mmHg                                 | 110±6     | 92±5                 | 98±3                  | 102±3                |
| dP/dt <sub>max</sub> , mmHg/s              | 7708±442  | 8148±585             | 5938±372 <sup>†</sup> | 7270±324*            |
| dP/dt <sub>min</sub> , mmHg/s              | 5296±235  | 4311±249             | 3980±341 <sup>†</sup> | 3676±235             |
| dP/dt <sub>max</sub> :dP/dt <sub>min</sub> | 1.42±0.07 | 1.90±0.11*           | 1.47±0.04             | 1.98±0.05*           |

HR, heart rate; SAP or DAP, systolic or diastolic arterial pressure; LVEDP: LV end-diastolic pressure; LVSP, LV systolic pressure. \* $P<0.05$  vs. respective NTG group; <sup>†</sup> $P<0.05$  vs. respective SH group by one-way ANOVA.

Table 3

Body and organ weights determined at autopsy at the end of the 15-week study period

| Parameters          | NTG/SH    | $\alpha_{1A}$ -TG/SH | NTG/MI     | $\alpha_{1A}$ -TG/MI |
|---------------------|-----------|----------------------|------------|----------------------|
| Group size          | 9         | 9                    | 20         | 19                   |
| Body weight (BW), g | 28±1      | 26±1                 | 29±1       | 29±1                 |
| Infarct size, %LV   | –         | –                    | 32.1±2.2   | 29.4±1.7             |
| LV/BW, mg/g         | 3.52±0.2  | 3.32±0.1             | 3.70±0.1*  | 3.66±0.1*            |
| RV/BW, mg/g         | 0.85±0.05 | 0.86±0.05            | 0.92±0.06* | 0.88±0.08            |
| Atria/BW, mg/g      | 0.47±0.03 | 0.47±0.03            | 0.74±0.10* | 0.86±0.09*           |
| Heart/BW, mg/g      | 4.83±0.2  | 4.65±0.2             | 5.36±0.2*  | 5.39±0.3*            |
| Lung/BW, mg/g       | 5.4±0.3   | 5.6±0.3              | 6.6±0.6*   | 7.6±0.8*             |
| Chest fluid, %      | 0         | 0                    | 40*        | 33                   |
| Atrial thrombus, %  | 0         | 0                    | 30         | 33                   |

LV, left ventricle; RV: right ventricle. \* $P<0.05$  vs. respective sham-operated group by one-way ANOVA.

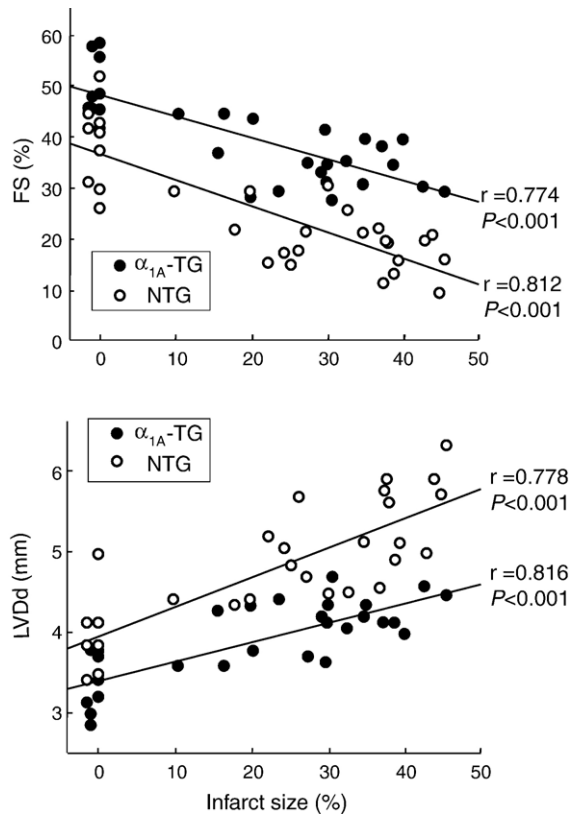

Fig. 3. Diagrams showing infarct size negatively correlated with echocardiography-derived fractional shortening (FS) and positively correlated with LV end-diastolic dimension (LVDd) as determined at 15-weeks after MI in NTG ( $n=31$ ) and  $\alpha_{1A}$ -TG mice ( $n=30$ ). Irrespective of infarct size, the difference in FS and LVDd between the two groups is evident.

Table 4

Organ weights, cardiac dimensions and systemic hemodynamics in 12-month-old NTG and  $\alpha_{1A}$ -TG mice

| Parameters                                 | NTG       | $\alpha_{1A}$ -TG |
|--------------------------------------------|-----------|-------------------|
| Body weight, g                             | 35±2      | 33±2              |
| Tibia length, mm                           | 18.2±0.1  | 18.2±0.1          |
| LV, mg                                     | 99±5      | 95±4              |
| Heart, mg                                  | 135±6     | 129±5             |
| LVDd, mm                                   | 4.1±0.04  | 3.7±0.2           |
| LVDs, mm                                   | 2.6±0.1   | 2.0±0.1*          |
| FS, %                                      | 37±2      | 45±2*             |
| HR, beats/min                              | 408±18    | 412±10            |
| SAP, mmHg                                  | 95±3      | 102±6             |
| DAP, mmHg                                  | 61±3      | 66±4              |
| LVEDP, mmHg                                | 7.1±0.7   | 5.8±0.9           |
| LVSP, mmHg                                 | 96±3      | 107±5*            |
| dP/dt <sub>max</sub> , mmHg/s              | 7349±447  | 8915±379*         |
| dP/dt <sub>min</sub> , mmHg/s              | 5525±265  | 5226±350          |
| dP/dt <sub>max</sub> :dP/dt <sub>min</sub> | 1.33±0.03 | 1.79±0.11*        |

Abbreviations see Tables 1–3.  $n=12$  to 20 mice/group with gender matching. \* $P<0.05$  vs. NTG by ANOVA.

viable LV myocardium after MI, whereas only procollagen-3 mRNA expression was significantly increased in infarcted  $\alpha_{1A}$ -TG hearts (Fig. 4). Expression of MMP-2, 9 and 13 transcripts were not significantly different between NTG and  $\alpha_{1A}$ -TG hearts with and without MI (data not shown). Expression of CTGF mRNA was significantly higher (~2.7-fold and ~1.6-fold, respectively) in  $\alpha_{1A}$ -TG than in the NTG hearts of sham-operated and infarcted mice while fibronectin mRNA level was higher in  $\alpha_{1A}$ -TG hearts with MI (Fig. 4).

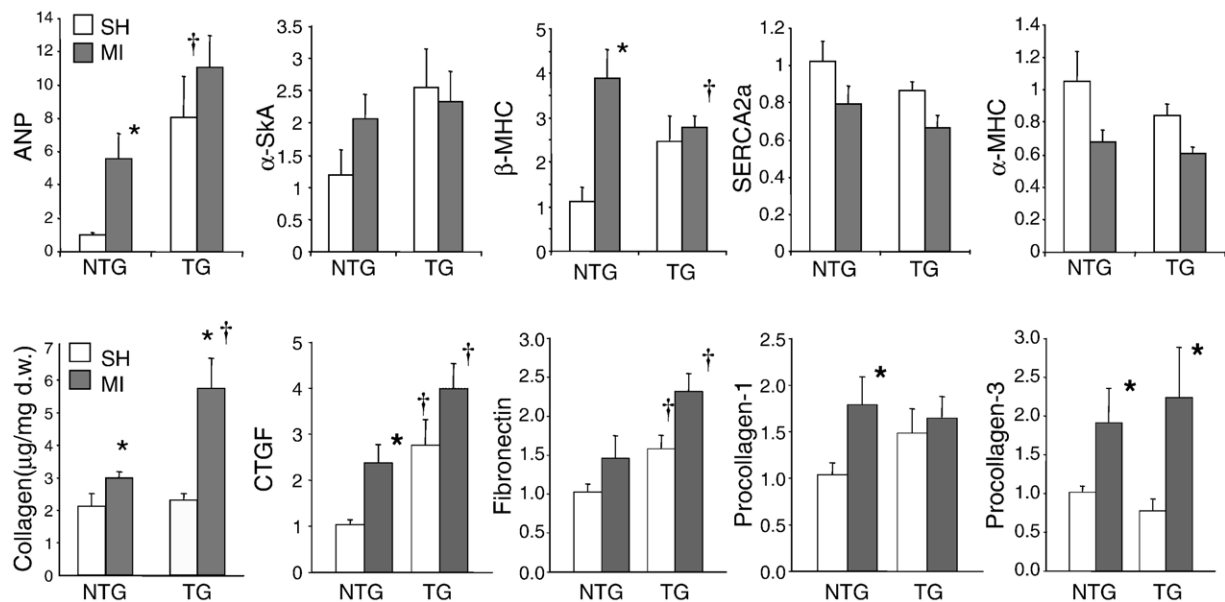

Fig. 4. Expression, in the non-infarcted LV myocardium of sham-operated (SH) and infarcted (MI) NTG and  $\alpha_{1A}$ -TG mice, of atrial natriuretic peptide (ANP),  $\alpha$ -skeletal actin ( $\alpha$ -Ska),  $\beta$ -myosin heavy chain ( $\beta$ -MHC),  $\alpha$ -myosin heavy chain ( $\alpha$ -MHC) sarcoendoplasmic reticulum  $\text{Ca}^{2+}$ -ATPase 2a (SERCA2a), connective tissue growth factor (CTGF), fibronectin, and procollagens-1 and 3, as determined by quantitative real-time PCR. Values shown are relative expression levels determined by normalizing the expression of the test genes to 18S rRNA as a reference gene. Also shown are collagen in LVs from SH and viable LV from infarcted mice (MI). d.w. = dry weight; \* $P<0.05$  vs. respective SH group; and † $P<0.05$  vs. respective NTG group by two-way ANOVA.

### 3.6. Cardiac function in 12-month-old mice

A cohort of  $\alpha_{1A}$ -TG and NTG mice ( $n=25$ /group) were monitored for up to 12-months of age. There was no death over this time in either genotype, and echocardiography and micromanometry studies at the end of this time revealed persistence of the hypercontractile phenotype in the  $\alpha_{1A}$ -TGs mice (Table 4). At this age, LV and heart weights were comparable, but collagen content was higher in the LVs of  $\alpha_{1A}$ -TG versus the NTG groups ( $2.69 \pm 0.04$  vs.  $2.03 \pm 0.11$   $\mu\text{g}/\text{mg}$  dry weight,  $P < 0.05$ ).

## 4. Discussion

We previously demonstrated that  $\alpha_{1A}$ -TG mice have better preservation of cardiac function, despite similar degrees of hypertrophy, than their NTG counterpart, when subjected to thoracic aorta constriction-induced pressure-overload [6]. Importantly, preservation of function in the former was associated with reduced mortality from HF. Here we studied the response of these  $\alpha_{1A}$ -TG mice to the hemodynamic stress of MI. Our results show that despite similar sized infarcts as compared to their NTG littermates, enhanced inotropy in the  $\alpha_{1A}$ -TG mice was preserved over a 15-week period of observation, and was associated with fewer acute deaths that were due most likely to HF. Importantly, as determined by serial echocardiography, progressive ventricular dilatation observed in the NTG mice during the chronic phase of MI, was attenuated in  $\alpha_{1A}$ -TG animals. We have also shown that the hypercontractile function persists in 12-month-old  $\alpha_{1A}$ -TG animals and this is not associated with premature mortality over the observation period. Collectively, these findings indicate that cardiac-restricted overexpression of the  $\alpha_{1A}$ -AR at the level studied, provides inotropic support to the infarcted ventricle and limits post-infarct remodeling. In keeping with our findings and those of our previous study [6], O'Connell et al. [19] recently demonstrated that dual inactivation of both  $\alpha_{1A}$ - and  $\alpha_{1B}$ -ARs increased interstitial fibrosis and apoptosis, and attenuated LV function under conditions of pressure-overload.

An acute functional decline and LV dilatation that were of a similar magnitude in both NTG and  $\alpha_{1A}$ -TG mice were observed at week-1 after MI. These changes are the expected initial responses to the loss of a substantial amount of LV mass, but are also partly due to the insult of open-chest surgery *per se*, since sham-operated controls displayed similar but less marked functional decline. The functional benefit of enhanced contractility due to transgenic  $\alpha_{1A}$ -AR activation become more evident in the chronic phase post-MI as the  $\alpha_{1A}$ -TG animals did not display the continued progression of global ventricular dilatation observed in the NTG animals. We previously found that FVB/N mice have a high incidence of acute HF death following MI [17]. This was confirmed in the present study of the  $\alpha_{1A}$ -TG on a FVB/N background. Interestingly,

transgenic activation of the  $\alpha_{1A}$ -AR in the heart of the A1A2 line studied here reduced acute HF deaths after MI. This finding suggests that the increased inotropy due to  $\alpha_{1A}$ -AR overexpression, evidenced by higher FS, is compensatory in the acute post-MI period. Indeed, a greater lung wet weight in  $\alpha_{1A}$ -TG than in the NTG mice that died acutely suggests a better tolerance of HF-associated pulmonary congestion in the former. However, no survival advantage was evident during the chronic phase of MI nor was there a difference in the incidence of chronic HF, as evidenced by the presence of chest fluid accumulation, lung congestion and atrial thrombus in the two groups of mice. This is likely due to the fact that we specially avoided creating large sized infarcts in this study because of the marked sensitivity of this mouse strain to acute HF after MI. Another factor that may have contributed to the lack of a difference in the incidence of sequel in the chronic phase post-MI, despite the progressive nature of LV remodeling in NTGs, is that the study period may not have been long enough to allow for progression to decompensated HF. In addition, some “side-effects” of  $\alpha_{1A}$ -AR overexpression and inotropic phenotype, such as long-term higher energy expenditure and increased interstitial collagen in  $\alpha_{1A}$ -TGs, offset in part the beneficial effects.

Unlike the  $\alpha_{1A}$ -TG model studied here following MI, and previously in response to pressure-overload [6], the enhanced ventricular contractility observed in several other mouse models is lost when they are subjected to a disease-causing hemodynamic challenge [8,16,20]. For example, whereas a TG model of  $\beta_2$ -AR overexpression [21] shows preserved myocardial contractile augmentation, when subjected to chronic MI [7], pressure-overload-induced HF development was facilitated and exacerbated in this model and HF-related deaths were increased [8,16]. Likewise, functional benefit was not observed after pressure-overload in mice with a dramatic enhancement in myocardial contractility due to phospholamban deficiency [20]. Thus, the mechanisms mediating enhanced inotropy are likely to be distinct, with only that associated with enhanced  $\alpha_{1A}$ -AR signaling being persistent long-term under different diseased conditions: a contention supported by the marked increase in the ratio of  $dP/dt_{\text{max}}:dP/dt_{\text{min}}$  in the  $\alpha_{1A}$ -TG mice but no in other genetically engineered models.

Enhanced sympatho-adrenergic signaling observed with cardiac disease, is associated with adverse consequences [22]. For example, mice with transgenic overexpression of the  $\beta_1$ -AR [23] the  $\beta_2$ -AR [8,24], the stimulatory GTP-binding protein Gs $\alpha$  [25] or the  $\alpha_{1B}$ -AR [26,27] all develop cardiac pathology, dysfunction and premature death, and the incidence of these events increases with age. The  $\alpha_{1A}$ -TG model is no exception since we recently showed that with ageing mice of other  $\alpha_{1A}$ -TG lines that overexpress the receptor at much higher levels (120- or 170-fold) than the A1A2 line (66-fold) studied here, develop progressive cardiac fibrosis, partial loss of the inotropic phenotype and sudden rather than HF deaths [4]. It is of interest, therefore, that in this study on A1A2 line, cardiac function at baseline

continued to be higher than that of their NTG littermates even at 12 months of age, and despite the fact that at this age collagen content in the LV myocardium was increased by 32%. This is in keeping with the view, as documented in  $\beta_2$ -AR TG lines by Liggett et al [24] that extremely high levels of AR overexpression are detrimental. However, unlike a range of other murine cardiomyopathy models, the  $\alpha_{1A}$ -TG model does not develop hypertrophy even at an advanced age [4].

Post-infarct ventricular remodeling involves regional expansion, chamber dilatation, hypertrophy of non-infarcted myocardium and interstitial fibrosis [9,28]. Acute LV dilatation following MI is largely attributable to infarct wall thinning and regional expansion, whereas dilatation that occurs during the chronic post-MI phase is due to the development of eccentric hypertrophy [10,28]. In this study, NTG and  $\alpha_{1A}$ -TG mice with MI had comparable increases in LV weight, despite loss of significant amounts of LV myocardium, indicating hypertrophy of the non-infarcted myocardium. Again, as concluded from studies of pressure-overloaded  $\alpha_{1A}$ -TG mice [6], the ability of this model to develop hypertrophy in response to the hemodynamic stress of MI excludes the possibility that  $\alpha_{1A}$ -AR overexpression modulates hypertrophic signaling — despite the observation that expression of hypertrophy-related genes, such as ANP and  $\alpha$ -SkA, is already increased at baseline in these  $\alpha_{1A}$ -TGs. The  $\alpha_{1A}$ -TG mice did, however, show a greater increase (+150%) in myocardial collagen post-MI than in the NTGs (+30%).

In the NTG animals, expression of CTGF mRNA was increased chronically after MI in the non-infarcted myocardium as well as being increased in the LVs of sham-operated and infarcted  $\alpha_{1A}$ -TG mice. Recent studies have shown that CTGF, in cooperation with transforming growth factor- $\beta$ , contributes to fibrotic signaling in hearts subjected to MI [29,30]. This is in keeping with our recent studies that revealed the development of a fibrotic phenotype and upregulation of CTGF with ageing in the A1A1 line overexpressing the  $\alpha_{1A}$ -AR by 170-fold [4]. There is good evidence that ANP signaling inhibits myocardial fibrosis [31]. However, collagen content was increased in the  $\alpha_{1A}$ -TG hearts with or without MI, despite a markedly upregulated ANP expression. Although potentially detrimental, increased interstitial collagen might in part be a compensatory matricellular change in response to a prolonged hypercontractility, allowing maintenance of myocyte structural integrity and contractile-force transduction. Nevertheless, it is of interest that the more marked interstitial fibrosis observed in the infarcted  $\alpha_{1A}$ -TG animals was not sufficient to compromise contractile function.

Whereas partial prevention and reversal of post-infarct ventricular remodeling have been reported with the use of angiotensin-converting enzymes inhibitors [32,33] or a LV assist device [34], other effective approaches remain to be developed. The exact mechanism for the suppressed remodeling in the  $\alpha_{1A}$ -TG model remains undefined. It is

likely, however, that the improved global LV function is expected to limit the increase in end-systolic volume and the resultant increase in wall stress, thereby, in part, preventing the development of chamber dilatation. Interestingly, inhibition of ventricular remodeling under conditions of dilated cardiomyopathy (due to deletion of muscle-LIM protein), or infarction, has been reported following genetic interventions that enhanced myocardial contractile function, including inhibition of phospholamban [13,14] or expression of the  $\beta$ -AR-kinase inhibitory peptide [35]. Based on these studies and our findings using the  $\alpha_{1A}$ -TG mice, it is plausible to suggest that enhancing contractility of the viable myocardium is a promising approach to limit the extent of post-infarct ventricular remodeling — a response that carries deleterious consequences such as HF and arrhythmias.

Treatment of HF patients with conventional inotropic agents, like  $\beta$ -adrenergic agonists, phosphodiesterase (PDE) inhibitors or digitalis, has not been effective [36]. Likewise, calcium sensitizers possesses some unwanted actions including PDE-inhibition. Consistent with these clinical findings are recent research showing that transgenic enhancement of  $\beta$ -adrenergic signalling is detrimental [8,16,23–25]. The interpretation of these data could be that either the inotropic strategy is inappropriate or, alternatively, that approaches, which ultimately lead to increased cAMP, should be avoided. Our collective findings in the  $\alpha_{1A}$ -TG model with MI or pressure-overload [6] appear to support the second possibility. Thus, cardiac-restricted activation of  $\alpha_{1A}$ -AR signalling at a moderate level, via means such as gene delivery, form a potential therapeutic approach to limit global cardiac remodeling and to improve survival from HF, albeit that long-term CTGF-mediated fibrosis may be an unwanted effect. Indeed, the findings from the  $\alpha_{1A}$ -TG model are consistent with the outcomes of the ALLHAT trial showing that treatment of hypertensive patients with the  $\alpha_1$ -antagonist, doxazosin, increased incidence of HF by 80%, compared to treatment with the diuretic, chlorthalidone [37]. However, we cannot exclude the possibility that another as yet undefined signalling pathway, which is altered by  $\alpha_{1A}$ -AR activation, contributes to the observed benefits.

## Acknowledgments

Supported in part by grants from the National Heart Foundation of Australia (G03M1126) and the National Health and Medical Research Council of Australia (#354400, #225108). We thank Kemble Wang for the technical assistance.

## References

- [1] Simpson P. Norepinephrine-stimulated hypertrophy of cultured rat myocardial cells is an  $\alpha_1$ -adrenergic response. *J Clin Invest* 1983;72: 732–8.
- [2] Simpson P. Stimulation of hypertrophy of cultured neonatal rat heart cells through an  $\alpha_1$ -adrenergic receptor and induction of beating through an  $\alpha_1$ - and  $\beta_1$ -adrenergic receptor interaction. Evidence for



- independent regulation of growth and beating. *Circ Res* 1985;56:884–94.
- [3] Lin F, Owens WA, Chen S, Stevens ME, Kesteven S, Arthur JF, et al. Targeted  $\alpha_{1A}$ -adrenergic receptor overexpression induces enhanced cardiac contractility but not hypertrophy. *Circ Res* 2001;89:343–50.
  - [4] Chautet H, Lin F, Guo J, Owens WA, Michalick J, Kesteven SH, et al. Sustained augmentation of cardiac  $\alpha_{1A}$ -adrenergic drive results in pathological remodeling with contractile dysfunction, progressive fibrosis and reactivation of matricellular protein genes. *J Mol Cell Cardiol* 2006;40:540–52.
  - [5] Bristow MR.  $\beta$ -Adrenergic receptor blockade in chronic heart failure. *Circulation* 2000;101:558–69.
  - [6] Du XJ, Lin F, Gao XM, Kiriazis H, Feng X, Hotchkin E, et al. Genetic enhancement of ventricular contractility protects against pressure-overload-induced cardiac dysfunction. *J Mol Cell Cardiol* 2004;37:979–87.
  - [7] Du XJ, Gao XM, Jennings GL, Dart AM, Woodcock EA. Preserved ventricular contractility in infarcted mouse heart overexpressing  $\beta_2$ -adrenergic receptors. *Am J Physiol Heart Circ Physiol* 2000;279:H2456–63.
  - [8] Du XJ, Autelitano DJ, Dilley RJ, Wang B, Dart AM, Woodcock EA.  $\beta_2$ -adrenergic receptor overexpression exacerbates development of heart failure after aortic stenosis. *Circulation* 2000;101:71–7.
  - [9] Pfeffer MA. Left ventricular remodeling after acute myocardial infarction. *Annu Rev Med* 1995;46:455–66.
  - [10] Weiss JL, Marino PN, Shapiro EP. Myocardial infarct expansion: recognition, significance and pathology. *Am J Cardiol* 1991;68:35D–40D.
  - [11] St. John Sutton M, Pfeffer MA, Moye L, Plappert T, Rouleau JL, Lamas G, et al. Cardiovascular death and left ventricular remodeling two years after myocardial infarction: baseline predictors and impact of long-term use of captopril: information from the Survival and Ventricular Enlargement (SAVE) trial. *Circulation* 1997;96:3294–9.
  - [12] van Rooij E, Doevendans PA, Crijns HJ, Heeneman S, Lips DJ, van Bilsen M, et al. MCP1 overexpression suppresses left ventricular remodeling and sustains cardiac function after myocardial infarction. *Circ Res* 2004;94:e18–26.
  - [13] Iwanaga Y, Hoshijima M, Gu Y, Iwatate M, Dieterle T, Ikeda Y, et al. Chronic phospholamban inhibition prevents progressive cardiac dysfunction and pathological remodeling after infarction in rats. *J Clin Invest* 2004;113:727–36.
  - [14] Minamisawa S, Hoshijima M, Chu G, Ward CA, Frank K, Gu Y, et al. Chronic phospholamban-sarcoplasmic reticulum calcium ATPase interaction is the critical calcium cycling defect in dilated cardiomyopathy. *Cell* 1999;99:313–22.
  - [15] Gao XM, Dart AM, Dewar E, Jennings G, Du XJ. Serial echocardiographic assessment of left ventricular dimensions and function after myocardial infarction in mice. *Cardiovasc Res* 2000;45:330–8.
  - [16] Sheridan DJ, Autelitano DJ, Wang B, Percy E, Woodcock EA, Du XJ.  $\beta_2$ -adrenergic receptor overexpression driven by  $\alpha$ -MHC promoter is downregulated in hypertrophied and failing myocardium. *Cardiovasc Res* 2000;47:133–41.
  - [17] Gao XM, Xu Q, Kiriazis H, Dart AM, Du XJ. Mouse model of post-infarct ventricular rupture: time course, strain- and gender-dependency, tensile strength, and histopathology. *Cardiovasc Res* 2005;65:469–77.
  - [18] Du XJ, Samuel CS, Gao XM, Zhao L, Parry LJ, Tregear GW. Increased myocardial collagen and ventricular diastolic dysfunction in relaxin deficient mice: a gender-specific phenotype. *Cardiovasc Res* 2003;57:395–404.
  - [19] O'Connell TD, Swigart PM, Rodrigo MC, Ishizaka S, Joho S, Turnbull L, et al.  $\alpha_1$ -Adrenergic receptors prevent a maladaptive cardiac response to pressure overload. *J Clin Invest* 2006;116:1005–15.
  - [20] Kiriazis H, Sato Y, Kadambi VJ, Schmidt AG, Gerst MJ, Hoit BD, et al. Hypertrophy and functional alterations in hyperdynamic phospholamban-knockout mouse hearts under chronic aortic stenosis. *Cardiovasc Res* 2002;53:372–81.
  - [21] Milano CA, Allen LF, Rockman HA, Dolber PC, McMinn TR, Chien KR, et al. Enhanced myocardial function in transgenic mice overexpressing the  $\beta_2$ -adrenergic receptor. *Science* 1994;264:582–6.
  - [22] Bristow MR. Mechanism of action of beta-blocking agents in heart failure. *Am J Cardiol* 1997;80:26L–40L.
  - [23] Engelhardt S, Hein L, Wiesmann F, Lohse MJ. Progressive hypertrophy and heart failure in  $\beta_1$ -adrenergic receptor transgenic mice. *Proc Natl Acad Sci U S A* 1999;96:7059–64.
  - [24] Liggett SB, Tepe NM, Lorenz JN, Canning AM, Jantz TD, Mitarai S, et al. Early and delayed consequences of  $\beta_2$ -adrenergic receptor overexpression in mouse hearts: critical role for expression level. *Circulation* 2000;101:1707–14.
  - [25] Gaudin C, Ishikawa Y, Wight DC, Mahdavi V, Nadal-Ginard B, Wagner TE, et al. Overexpression of Gs $\alpha$  protein in the hearts of transgenic mice. *J Clin Invest* 1995;95:1676–83.
  - [26] Lemire I, Ducharme A, Tardif JC, Poulin F, Jones LR, Allen BG, et al. Cardiac-directed overexpression of wild-type  $\alpha_{1B}$ -adrenergic receptor induces dilated cardiomyopathy. *Am J Physiol Heart Circ Physiol* 2001;281:H931–8.
  - [27] Milano CA, Dolber PC, Rockman HA, Bond RA, Venable ME, Allen LF, et al. Myocardial expression of a constitutively active  $\alpha_{1B}$ -adrenergic receptor in transgenic mice induces cardiac hypertrophy. *Proc Natl Acad Sci U S A* 1994;91:10109–13.
  - [28] Vaughan DE, Pfeffer MA. Post-myocardial infarction ventricular remodeling: animal and human studies. *Cardiovasc Drugs Ther* 1994;8:453–60.
  - [29] Chuva de Sousa-Lopes SM, Feijen A, Korving J, Korchynskiy O, Larsson J, Karlsson S, et al. Connective tissue growth factor expression and Smad signaling during mouse heart development and myocardial infarction. *Dev Dyn* 2004;231:542–50.
  - [30] Dean RG, Balding LC, Candido R, Burns WC, Cao Z, Twigg SM, et al. Connective tissue growth factor and cardiac fibrosis after myocardial infarction. *J Histochem Cytochem* 2005;53:1245–56.
  - [31] Nishikimi T, Maeda N, Matsuoka H. The role of natriuretic peptides in cardioprotection. *Cardiovasc Res* 2006;69:318–28.
  - [32] Pfeffer MA, Greaves SC, Arnold JM, Glynn RJ, LaMotte FS, Lee RT, et al. Early versus delayed angiotensin-converting enzyme inhibition therapy in acute myocardial infarction. The healing and early afterload reducing therapy trial. *Circulation* 1997;95:2643–51.
  - [33] Hayashida W, Van Eyll C, Rousseau MF, Pouleur H. Regional remodeling and nonuniform changes in diastolic function in patients with left ventricular dysfunction: modification by long-term enalapril treatment. The SOLVD Investigators. *J Am Coll Cardiol* 1993;22:1403–10.
  - [34] Boehmer JP. Device therapy for heart failure. *Am J Cardiol* 2003;91:53D–9D.
  - [35] White DC, Hata JA, Shah AS, Glower DD, Lefkowitz RJ, Koch WJ. Preservation of myocardial  $\beta$ -adrenergic receptor signaling delays the development of heart failure after myocardial infarction. *Proc Natl Acad Sci U S A* 2000;97:5428–33.
  - [36] Felker GM, O'Connor CM. Inotropic therapy for heart failure: an evidence-based approach. *Am Heart J* 2001;142:393–401.
  - [37] ALLHAT Officers and Coordinators for the ALLHAT Collaborative Research Group. Diuretic versus  $\alpha$ -blocker as first-step antihypertensive therapy: final results from the Antihypertensive and Lipid-Lowering Treatment to Prevent Heart Attack Trial (ALLHAT). *Hypertension* 2003;42:239–46.
